CORRECTION

# Correction: Mouse IgG2c Fc loop residues promote greater receptor-binding affinity than mouse IgG2b or human IgG1

The *PLOS ONE* Staff

The sequences appearing in the lower panel of [Fig 1E](#) are not properly aligned due to a technical error. Please see the complete, correct [Fig 1](#) here. The publisher apologizes for the error.

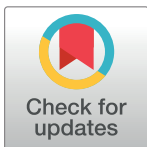

## OPEN ACCESS

**Citation:** The *PLOS ONE* Staff (2018) Correction: Mouse IgG2c Fc loop residues promote greater receptor-binding affinity than mouse IgG2b or human IgG1. *PLoS ONE* 13(4): e0196609. <https://doi.org/10.1371/journal.pone.0196609>

**Published:** April 24, 2018

**Copyright:** © 2018 The PLOS ONE Staff. This is an open access article distributed under the terms of the [Creative Commons Attribution License](#), which permits unrestricted use, distribution, and reproduction in any medium, provided the original author and source are credited.

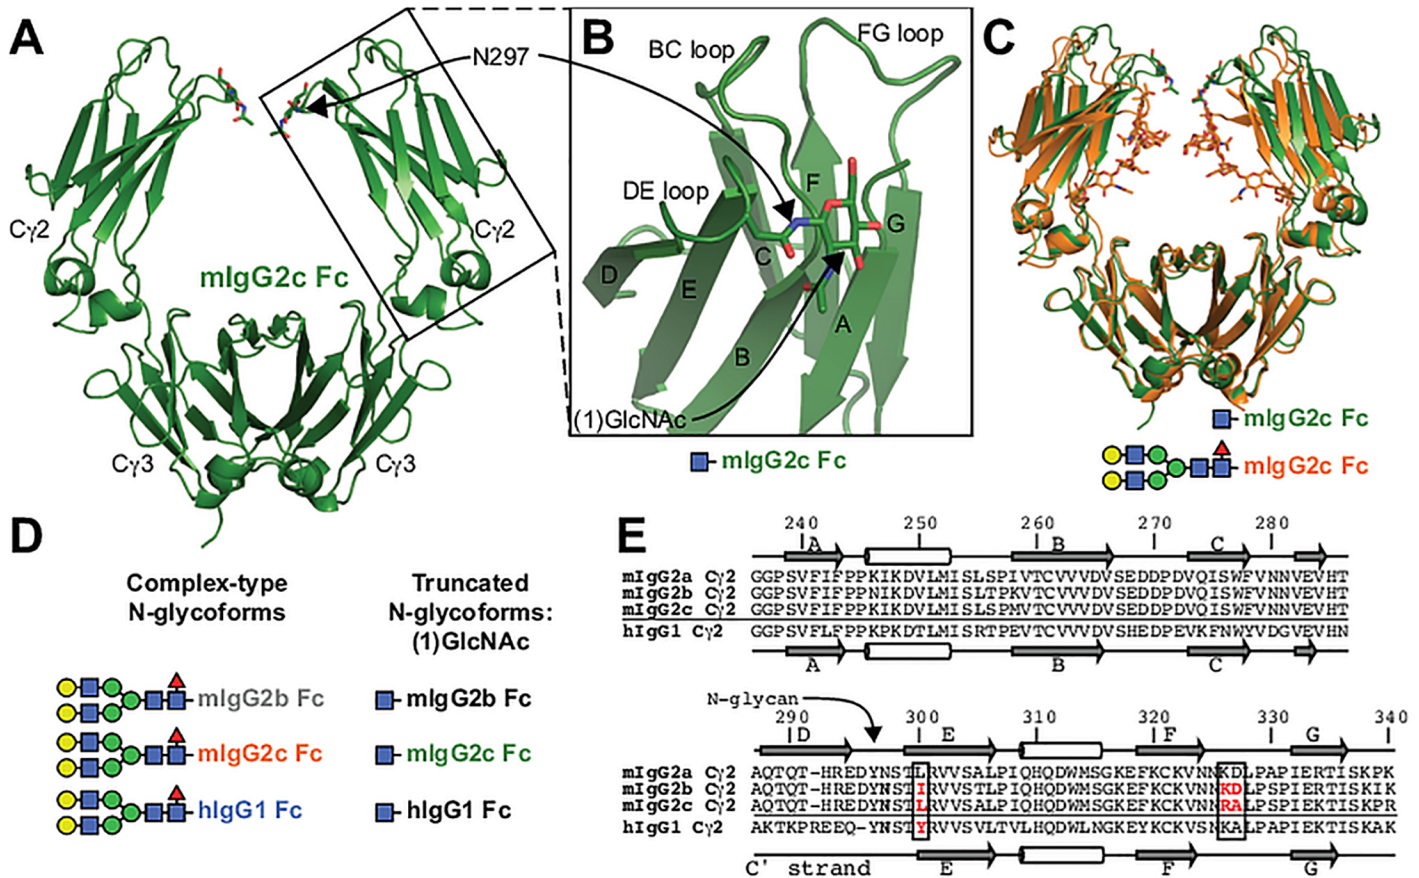

**Fig 1. Mouse IgG2c Fc is comparable to other IgGs but shows differences in crucial features.** A. A cartoon model of mouse IgG2c Fc solved by x-ray crystallography. Domain and secondary structure element labels (B.) are noted. C. An overlay of two mouse IgG2c Fc models with different N-glycan composition. D. A cartoon schematic showing the glycoforms studied here, individual carbohydrate residues are indicated by colored shapes according to the SNFG system [2]. The colors of individual Fcs will be used as indicated throughout the text to denote sequence and glycan variants. E. Sequence and secondary structure arrangement of the Fc C $\gamma$ 2.

<https://doi.org/10.1371/journal.pone.0196609.g001>

## Reference

1. Falconer DJ, Barb AW (2018) Mouse IgG2c Fc loop residues promote greater receptor-binding affinity than mouse IgG2b or human IgG1. PLoS ONE 13(2): e0192123. <https://doi.org/10.1371/journal.pone.0192123> PMID: 29408873
